# Supplementary material for: Electron beam irradiation grafting of metal–organic frameworks onto cotton to prepare antimicrobial textiles
Source: Royal Society of Chemistry journal article supplement (doi:10.1039/d2ra07144d), 2023-01-01
Supplement: d2ra07144d1.pdf [file d2ra07144d1.pdf]

## Supplementary Information

**Title:** Electron beam irradiation grafting of metal-organic frameworks onto cotton to prepare antimicrobial textiles.

**Authors:** Zepeng Liu,<sup>ab</sup> Ziqiang Wang,<sup>b</sup> Yu Meng,<sup>a</sup> Yongchang Song,<sup>a</sup> Linfan Li,<sup>\*b</sup> Ming Yu<sup>\*a</sup> and Jingye Li<sup>ab</sup>

**Affiliations:**

- a. MOE Key Laboratory of Resource Chemistry and Shanghai Key Laboratory of Rare Earth Functional Materials, College of Chemistry and Materials Science, Shanghai Normal University, Shanghai 200234, China.
- b. Shanghai Institute of Applied Physics, Chinese Academy of Sciences, Shanghai 201800, China.

**\*Corresponding author.** E-mail address: [yuming@shnu.edu.cn](mailto:yuming@shnu.edu.cn), [lilinfan@sinap.ac.cn](mailto:lilinfan@sinap.ac.cn)

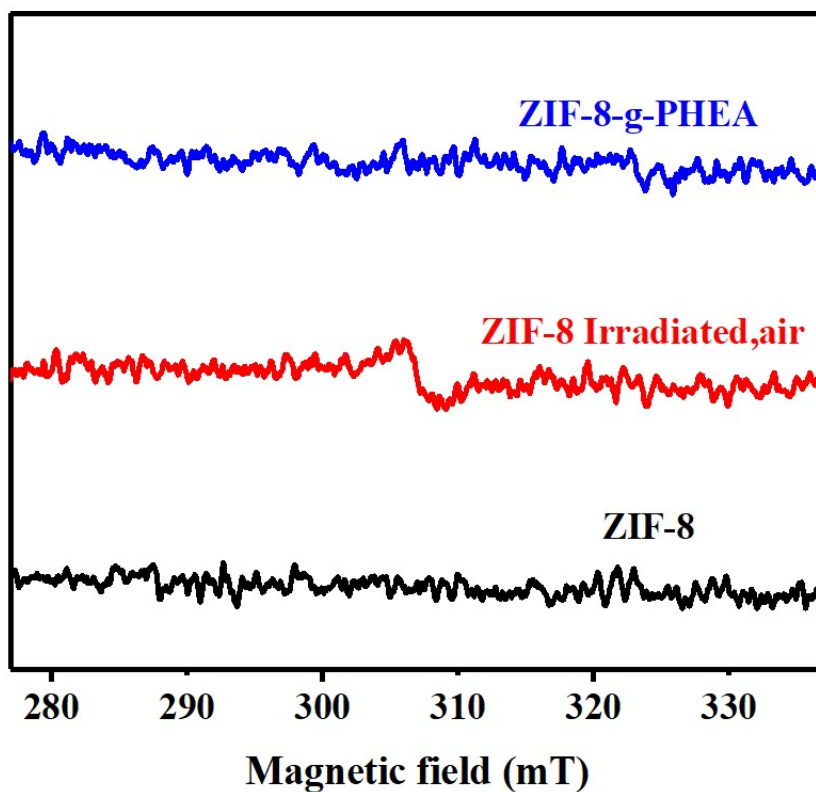

**Figure S1.** The electron spin-resonance (ESR) spectroscopy of ZIF-8, ZIF-8 irradiated in air and ZIF-8-g-PHEA.

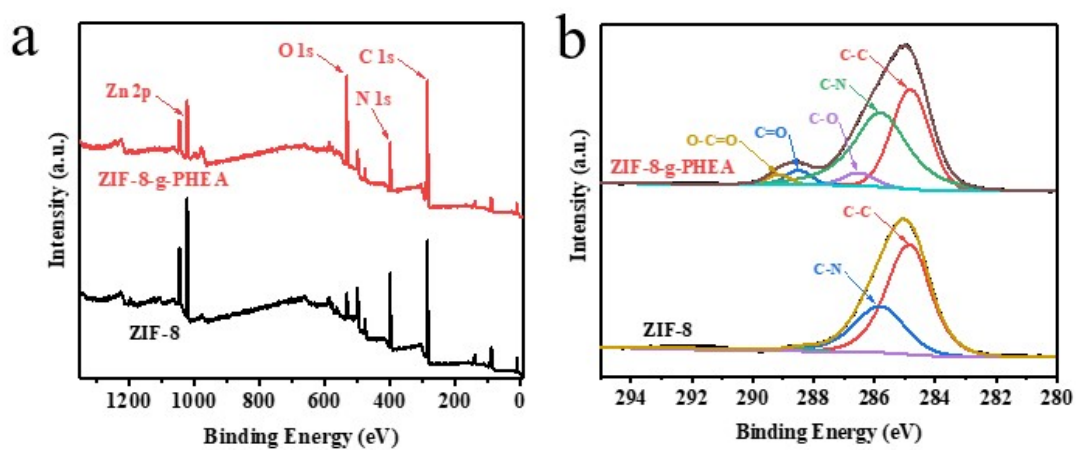

**Figure S2.** ZIF-8 and its radiation effect. **a**, XPS spectra of ZIF-8 and ZIF-8-g-PHEA. **b**, XPS C1s spectra of ZIF-8 and ZIF-8-g-PHEA.

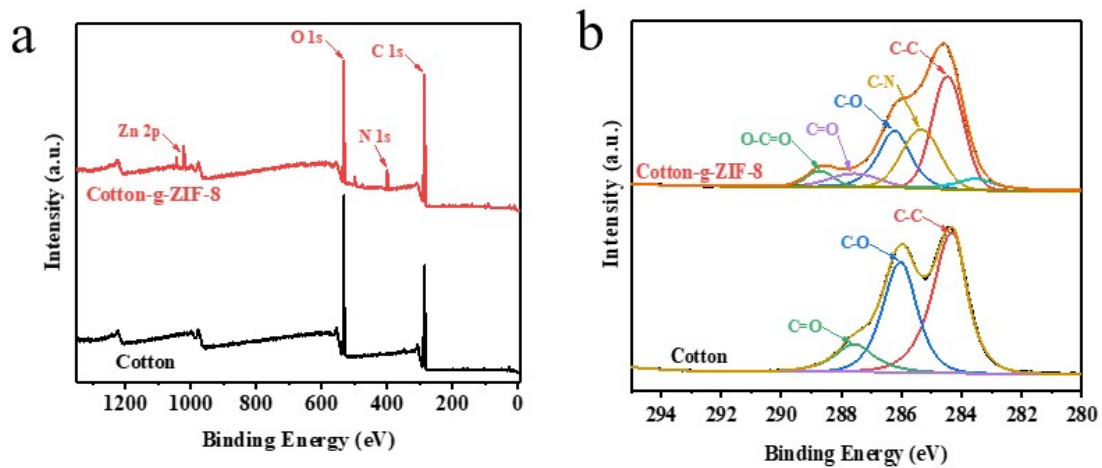

**Figure S3.** Characterization of Cotton-g-ZIF-8. **a**, XPS spectra of Cotton and Cotton-g-ZIF-8. **b**, XPS C1s spectra of Cotton and Cotton-g-ZIF-8.

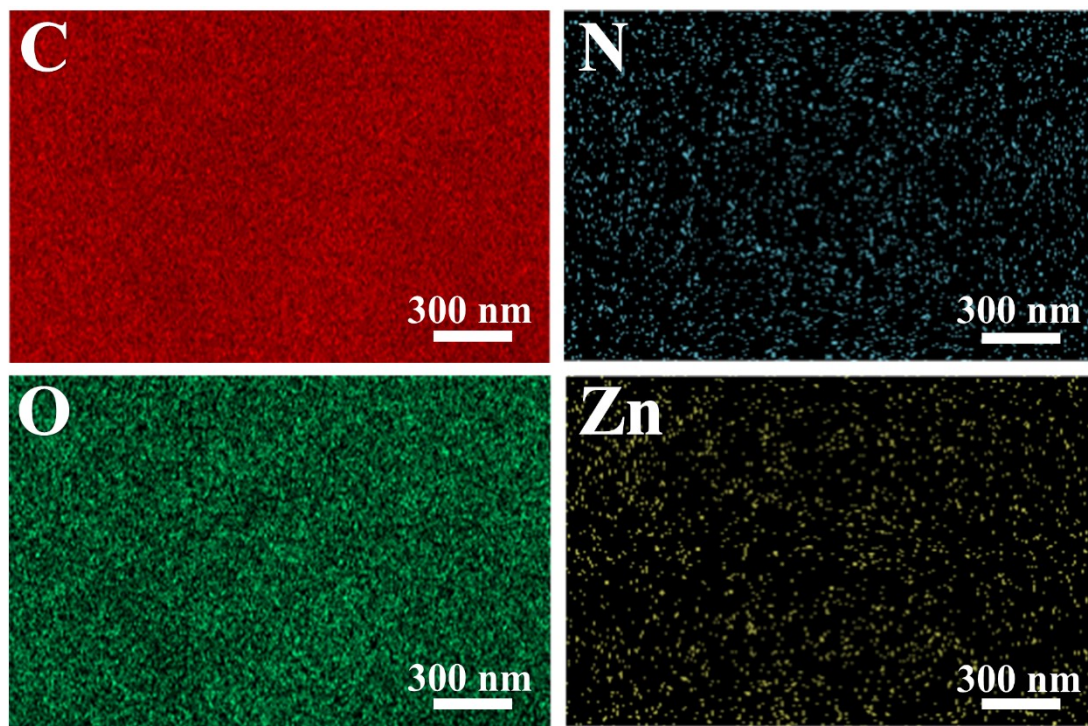

**Figure S4.** EDS analysis of Cotton-g-ZIF-8.

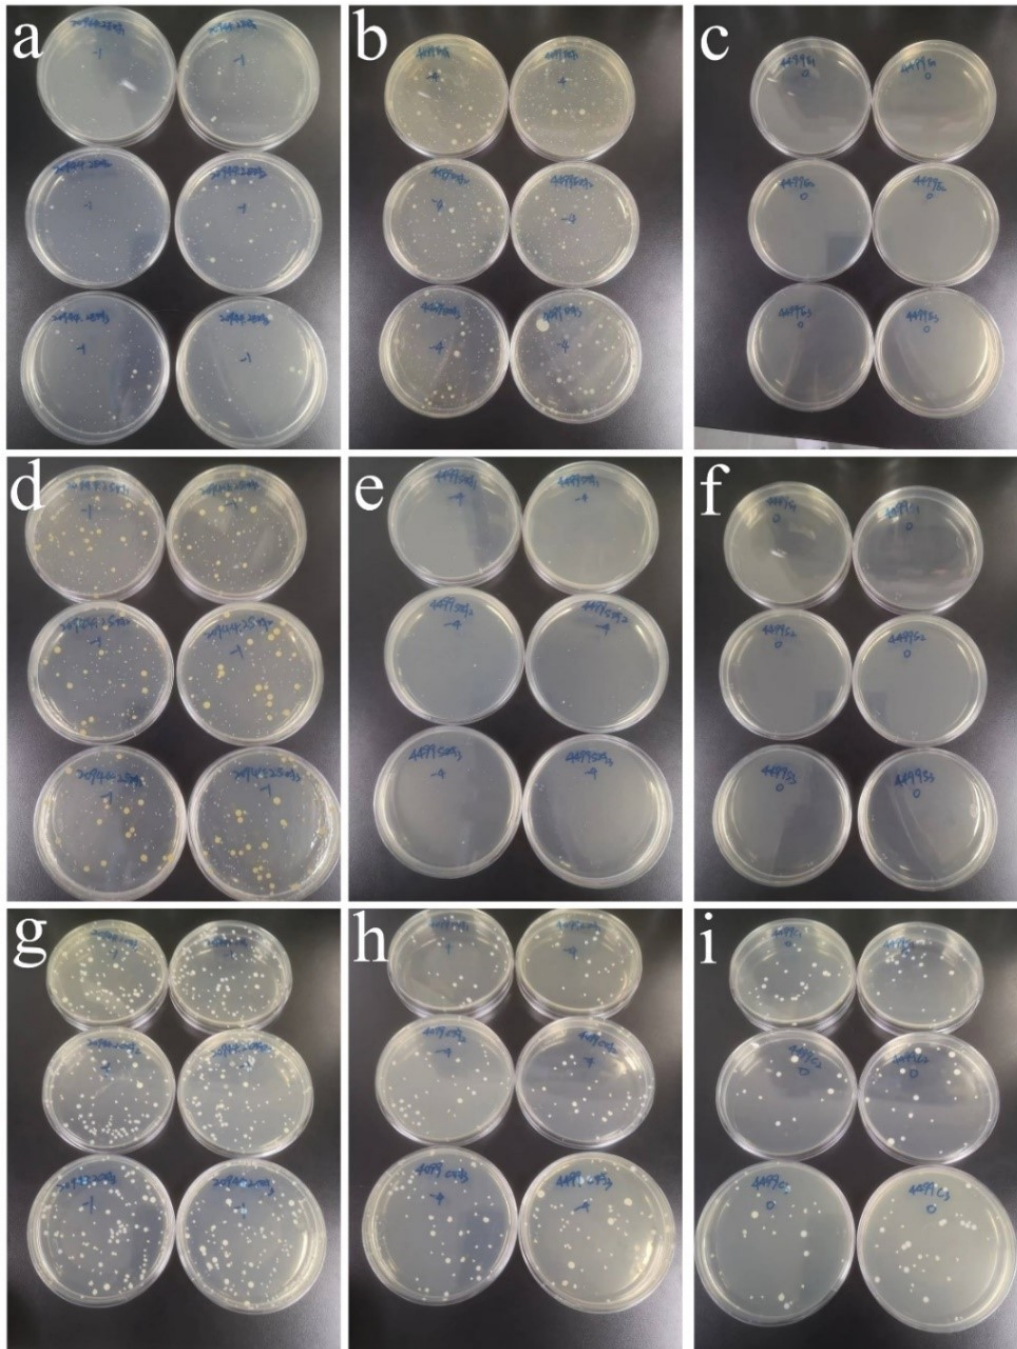

**Figure S5.** Antimicrobial performance of Cotton-g-ZIF-8. **a**, Control sample at 0 h (dilution ratio  $10^{-1}$ ); **b**, control sample at 24 h (dilution ratio  $10^{-4}$ ); **c**, Cotton-g-ZIF-8 at 24 h (dilution ratio  $10^0$ ) for *Escherichia coli*. **d**, Control sample at 0 h (dilution ratio  $10^{-1}$ ); **e**, control sample at 24 h (dilution ratio  $10^{-4}$ ); **f**, Cotton-g-ZIF-8 at 24 h (dilution ratio  $10^0$ ) for *Staphylococcus aureus*. **g**, Control sample at 0 h (dilution ratio  $10^{-1}$ ); **h**, control sample at 24 h (dilution ratio  $10^{-4}$ ); **i**, Cotton-g-ZIF-8 at 24 h (dilution ratio  $10^0$ ) for *Candida albicans*.

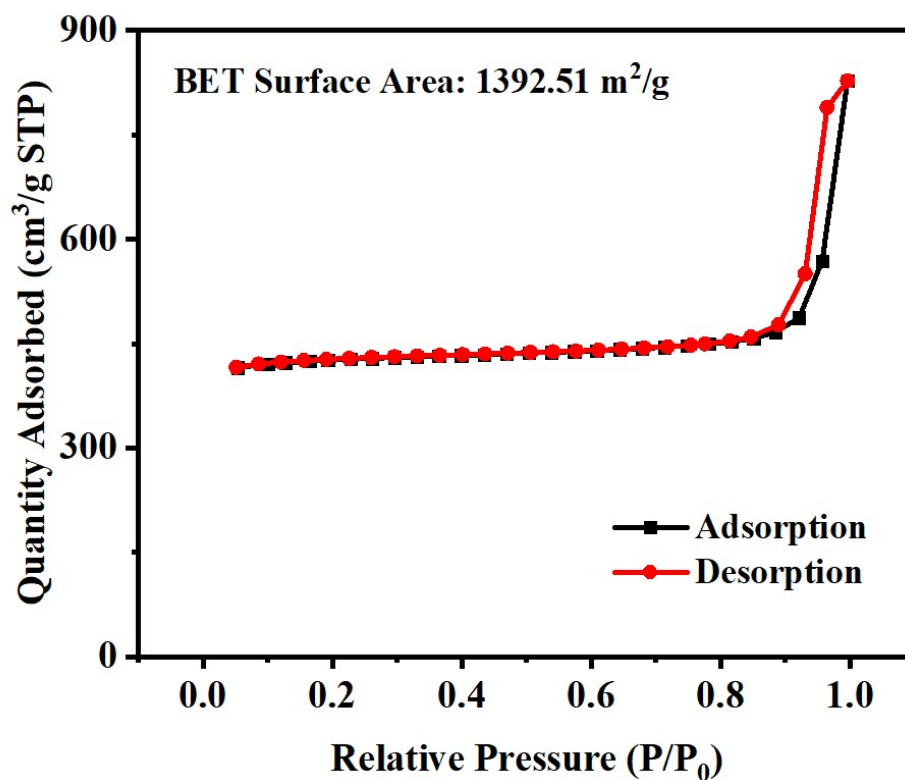

Figure S6. BET analysis of ZIF-8.

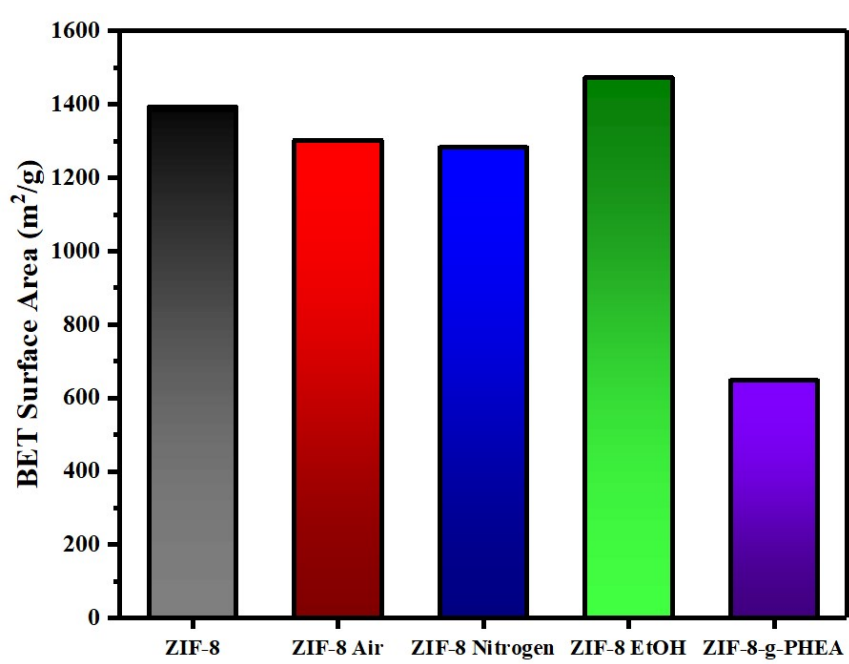

Figure S7. BET analysis of ZIF-8 and its irradiated products (at an absorbed dose of 50 kGy) in different environments.
